# 1 **Overexpression of key sterol pathway enzymes in two model** 2 **marine diatoms alters sterol profiles in *Phaeodactylum*** 3 ***tricornutum***

4 Ana Cristina Jaramillo-Madrid<sup>1</sup>, Raffaella Abbriano<sup>1</sup>, Justin Ashworth<sup>1</sup>, Michele Fabris<sup>1,2</sup>,  
5 Peter J. Ralph<sup>1</sup>

6 <sup>1</sup>Climate Change Cluster, University of Technology Sydney, Australia, NSW 2007

7 <sup>2</sup>CSIRO Synthetic Biology Future Science Platform, GPO Box 2583, Brisbane, QLD 4001

## 8 **Abstract**

9 Sterols are a class of triterpenoid molecules with diverse functional roles in eukaryotic cells,  
10 including intracellular signaling and regulation of cell membrane fluidity. Diatoms are a  
11 dominant eukaryotic phytoplankton group that produce a wide diversity of sterol compounds.  
12 The enzymes 3-hydroxy-3-methyl glutaryl CoA reductase (*HMGR*) and squalene epoxidase  
13 (*SQE*) have been reported to be rate-limiting steps in sterol biosynthesis in other model  
14 eukaryotes; however, the extent to which these enzymes regulate triterpenoid production in  
15 diatoms is not known. To probe the role of these two metabolic nodes in the regulation of  
16 sterol metabolic flux in diatoms, we independently over-expressed two versions of the native  
17 *HMGR* and a conventional, heterologous *SQE* gene in the diatoms *Thalassiosira pseudonana*  
18 and *Phaeodactylum tricornutum*. Overexpression of these key enzymes resulted in significant  
19 differential accumulation of downstream sterol pathway intermediates in *P. tricornutum*.  
20 *HMGR*-mVenus overexpression resulted in the accumulation of squalene, cycloartenol, and  
21 obtusifoliol, while cycloartenol and obtusifoliol accumulated in response to heterologous  
22 No*SQE*-mVenus overexpression. In addition, accumulation of the end-point sterol 24-  
23 methylenecholesta-5,24(24')-dien-3 $\beta$ -ol was observed in all *P. tricornutum* overexpression  
24 lines, and campesterol increased 3-fold in *P. tricornutum* lines expressing No*SQE*-mVenus.  
25 Minor differences in end-point sterol composition were also found in *T. pseudonana*, but no  
26 accumulation of sterol pathway intermediates was observed. Despite the successful  
27 manipulation of pathway intermediates and individual sterols in *P. tricornutum*, total sterol  
28 levels did not change significantly in transformed lines, suggesting the existence of tight  
29 pathway regulation to maintain total sterol content.

## 30 INTRODUCTION

31 Sterols are essential triterpenoids that function as regulators of cell membrane dynamics in all  
32 eukaryotic organisms (Dufourc, 2008). In animals and higher plants, sterols participate in the  
33 synthesis of secondary metabolites involved in defense mechanisms, and steroid hormones  
34 that regulate growth and development (Valitova *et al.*, 2016). Due to their presence in ancient  
35 sediments, sterol compounds are used as durable biomarkers to track important evolutionary  
36 events (Gold *et al.*, 2017). Sterols of plant origin, known as phytosterols, are used as  
37 nutraceuticals for their cholesterol-lowering effects (Ras *et al.*, 2014). Other therapeutic  
38 applications such as anti-inflammatory (Aldini *et al.*, 2014) and anti-diabetic activities  
39 (Wang *et al.*, 2017) are currently under research. In order to meet increasing demands in the  
40 global phytosterols market, about 7–9% per annum (Borowitzka, 2013), diatoms have been  
41 proposed as an alternative source of sterols (Jaramillo-Madrid *et al.*, 2019).

42 Diatoms are primary constituents of phytoplankton communities and principal players in the  
43 global carbon cycle. These photosynthetic microorganisms are an important ecological group  
44 of microalgae present in a great diversity of aquatic environments (Armbrust, 2009). Diatoms  
45 exhibit higher photosynthetic efficiencies than plants and are adaptable to environmental  
46 challenges encountered in dynamic and competitive marine environments (Hildebrand *et al.*,  
47 2012), which are also characteristics suited to the microbial production of bioproducts.  
48 Diatoms are emerging as alternative and sustainable hosts for terpenoids production  
49 (D’Adamo *et al.*, 2019; Fabris *et al.*, 2020). As complex organisms with a particular  
50 evolution history, diatoms possess a unique metabolism (Fabris *et al.*, 2012, 2014; Pollier *et*  
51 *al.*, 2019; Jaramillo-Madrid *et al.*, 2020a) that can represent an advantage for production of  
52 terpenoid such as sterols (Vavitsas *et al.*, 2018).

53 Diatoms produce high proportions of a large variety of sterol compounds (Rampen *et al.*,  
54 2010). Sterol sulfates appear to be important regulators of diatom bloom dynamics, as they  
55 were shown to trigger programmed cell death in the marine diatom *Skeletonema marinoi*  
56 (Gallo *et al.*, 2017). Recent studies suggest that sterol biosynthesis is tightly regulated. Levels  
57 of intermediate compounds in sterol synthesis change in response to different environmental  
58 conditions (Jaramillo-Madrid *et al.*, 2020b) and to the addition of chemical inhibitors  
59 (Jaramillo-Madrid *et al.*, 2020a). However, end-point sterol levels remained unchanged under  
60 the same treatments. Deeper understanding of diatom sterol metabolism will provide  
61 ecological insights as well as enable future metabolic engineering efforts for biotechnological

62 applications. In particular, the regulation of the sterol biosynthesis in diatoms is not yet well  
63 understood.

64 Isoprenoid sterol precursors can be synthesized through either the cytosolic mevalonate  
65 (MVA) pathway or the plastidial methylerythriol phosphate (MEP) pathway. In most  
66 eukaryotic organisms, only one of the two pathways are present (Lohr *et al.*, 2012).  
67 However, in plants, both pathways are functional but the MVA provides the substrates for  
68 sterol biosynthesis (Vranova *et al.*, 2013). In diatoms, including the model diatoms  
69 *Thalassiosira pseudonana* and *Phaeodactylum tricornutum*, both pathways are functional  
70 (Jaramillo-Madrid *et al.*, 2020a). However, there is no evidence for MVA presence in some  
71 diatoms such as *Haslea ostrearia* and *Chaetoceros muelleri* (Massé *et al.*, 2004;  
72 Athanasakoglou *et al.*, 2019; Jaramillo-Madrid *et al.*, 2020a). In these diatoms, synthesis of  
73 isoprenoids may rely solely on the MEP pathway, as is the case for some green and red algae  
74 (Lohr *et al.*, 2012). The presence of both the MVA and MEP pathways is an advantage for  
75 engineering efforts, as it potentially provides a higher pool of intermediates for isoprenoid  
76 production (Sasso *et al.*, 2012; Jaramillo-Madrid *et al.*, 2020a). It has been recently  
77 demonstrated that in *P. tricornutum* products from MVA pathway accumulated in the  
78 cytoplasm can be used for the production of non-endogenous terpenoids such as geraniol,  
79 indicating presence of free GPP pool (Fabris *et al.*, 2020).

80 In the MVA pathway, three molecules of acetyl-CoA are transformed into isopentenyl  
81 diphosphate (IPP) and dimethylallyl diphosphate (DMAPP) (Fig. 1). In plants, fungi, and  
82 animals, the 3-hydroxy-3-methylglutaryl-co-enzyme-A reductase (HMGR, E.C. 1.1.1.34) is  
83 one of the key enzymes in the MVA pathway and catalyzes the reduction of HMG-CoA to  
84 mevalonate (Friesen & Rodwell, 2004). HMGR is known as main regulator and rate-limiting  
85 enzyme in early biosynthesis of sterol and non-sterol isoprenoids in MVA-harboring  
86 eukaryotic cells and it is highly regulated at the transcriptional, translational, and post-  
87 translational levels (Burg & Espenshade, 2011). In yeast and mammals, HMGR contains a  
88 sterol sensing domain (SSD) that is responsible for detecting sterol levels in the cell and  
89 maintaining sterol homeostasis (Espenshade & Hughes, 2007). The SSD is located in the N-  
90 terminal membrane binding domain of the HMGR enzyme (Burg & Espenshade, 2011).  
91 Moreover, it has been reported that genetic manipulations on HMGR, including truncation of  
92 N-terminal domain, led to considerable accumulation of terpenes in transgenic plants and  
93 yeast (Bansal *et al.*, 2018; Bröker *et al.*, 2018; Lee *et al.*, 2019). Although HMGR has been

94 extensively characterized in model eukaryotic organisms, little is known about its features in  
95 diatoms.

96 MVA products IPP and DMAPP are subsequently used for the synthesis of squalene, the first  
97 committed intermediate in the formation of sterols (Gill *et al.*, 2011) (Fig. 1). In plants, fungi,  
98 and animals, squalene is converted into 2,3 epoxysqualene. This reaction is conventionally  
99 catalyzed by the enzyme squalene epoxidase (SQE, E.C. 1.14.14.17) (Gill *et al.*, 2011).  
100 Several studies indicate that SQE is a control point in cholesterol synthesis modulated by  
101 sterol levels and post-translationally regulated by cholesterol-dependent proteasomal  
102 degradation (Nagai *et al.*, 2002b; Gill *et al.*, 2011). However, diatoms do not possess a  
103 conventional SQE, and instead this step is catalyzed by a recently characterized alternative  
104 squalene epoxidase (AltSQE) (Pollier *et al.*, 2019). The diatom AltSQE belongs to the fatty  
105 acid hydroxylase superfamily, and differs from the conventional flavoprotein SQE. Whether  
106 AltSQE has a similar role to SQE in sterol regulation is not known.

107 While selective inhibitors for AltSQE are not known, the treatment of diatoms with statins,  
108 known to inhibit *HMGR* enzymes, has resulted in perturbation of isoprenoids metabolism that  
109 included an overall decrease of total sterols content (Massé *et al.*, 2004; Conte *et al.*, 2018),  
110 suggesting that a conventional *HMGR* enzyme might be involved in the pathway. In this  
111 work, we genetically targeted the HMG CoA reduction and squalene epoxidation steps in *P.*  
112 *tricornutum* to provide further insights into the nature of the diatom sterol biosynthesis  
113 pathway and its regulatory constraints. Considering the demonstrated challenges in  
114 genetically down-regulating the essential genes involved in *P. tricornutum* sterol metabolism  
115 (Pollier *et al.*, 2019, Fabris *et al.*, 2014), we chose to investigate these pathway nodes by gene  
116 overexpression and subcellular localisation.

117 We generated independent diatom exconjugant lines constitutively expressing (i) either the  
118 full-length *HMGR*, (ii) an N-terminal truncated version of *HMGR* (*tHMGR*), or (iii) a  
119 heterologous SQE from *Nannochloropsis oceanica* (*NoSQE*) over the background of the  
120 endogenous AltSQE. By phenotyping these transgenic diatom cell lines, we describe specific  
121 changes in several nodes of the sterol biosynthesis pathway and provide evidence for  
122 regulatory mechanisms unique to diatom sterol metabolism.

## 123 **METHODOLOGY**

124 **Diatom culturing.** The species *P. tricornutum* (CCMP632) and *T. pseudonana* (CCMP1335)  
125 were obtained from the National Centre for Marine Algae and Microbiota at Bigelow  
126 Laboratory (USA). Axenic cultures were maintained in L1 medium (Guillard & Hargraves,  
127 1993) at 18°C under continuous cool white light (100  $\mu\text{mol photons m}^{-2} \text{s}^{-1}$ ) in a shaking  
128 incubator (100 rpm).

129 **Episome construction and transformation.** All episomes used in this study were assembled  
130 using uLoop assembly method (Pollak *et al.*, 2019). Individual components for episome  
131 assembly (L0 parts) were built and domesticated using uLoop assembly syntax. Assembly  
132 reactions were performed using the respective uLoop assembly backbones for each level as  
133 described by Pollak *et al.* (2018). After domestication, each L0 part was confirmed by Sanger  
134 sequencing. Correct episome assemblies were confirmed by colony PCR and diagnostic  
135 restriction digestion. The source of each DNA part and primers used for domestication are  
136 listed in Table S1. All L0 parts used to assemble the plasmids used in this work have been  
137 deposit in Addgene (Table S1). Plasmid maps (Fig. S1, S2) and complete plasmid sequence  
138 are provided in supplemental material.

139 Episomes consisted of a pCA-derived backbone (Pollak *et al.*, 2019), *CEN/ARS/HIS* and *OriT*  
140 sequences, a selection cassette, and an expression cassette (Fig. S1, S2). Sequence *OriT*  
141 required for bacterial conjugation were amplified from *pPtPBR11* plasmid (Diner *et al.*,  
142 2016) (Genebank KX523203). Selection markers nourseothricin (*NAT*) for *T. pseudonana*  
143 and blasticidin-S deaminase (*BSD*) for *P. tricornutum* were driven by elongation factor 2  
144 (*EF2*) constitutive promoters from corresponding diatom species (*T. pseudonana* v. 3 ID:  
145 269148; *P. tricornutum* v. 3 ID: *Phatr3\_J35766*). Expression cassettes included genes  
146 encoding either putative *HMGR*, *tHMGR*, or *NoSQE* each fused at the C-terminus with a  
147 mVenus fluorescent protein (Nagai *et al.*, 2002a), and an expression cassette expressing only  
148 mVenus was used to assemble an empty control vector (Figure S1). The open reading frames  
149 encoding putative *HMGR* and *tHMGR* were amplified from genomic DNA of either *T.*  
150 *pseudonana* (CCMP1335) (Gene ID *Thaps\_33680*) or *P. tricornutum* (CCMP632) (Gene ID  
151 *Phatr3\_J16870*) (Table S1). A domesticated, codon-optimized synthetic gene encoding *SQE*  
152 sequence from *Nannochloropsis oceanica* v.2 CCMP1779 (Gene ID 521007) was obtained  
153 from Genewiz® (USA). Expression of target genes were driven by the promoter of  
154 elongation factor 2 (*EF2*) in *T. pseudonana* and the promoter of predicted protein

155 *Phatr3\_J49202* in *P. tricornutum*. L0 parts for *CEN/ARS/HIS*, fluorescent reporter gene  
156 *mVenus*, *Phatr3\_J49202* promoter and terminator were obtained from Dr. Christopher  
157 Dupont (J. Craig Venter Institute, USA). The plasmid pTA-Mob for conjugation (Strand *et*  
158 *al.*, 2014) was obtained from Dr. Ian Monk (University of Melbourne, Australia).

159 **Diatom transformation and screening.** Diatoms were transformed by bacterial conjugation  
160 (Karas *et al.*, 2016). The transformation protocol for *T. pseudonana* was modified by  
161 increasing the starting bacterial density (OD<sub>600</sub> to 0.5) and the final incubation and recovery  
162 period for transformed diatom culture to 24 hrs prior to selection on plates containing  
163 nourseothricin. *T. pseudonana* and *P. tricornutum* colonies resistant to nourseothricin (50 µg  
164 ml<sup>-1</sup>) or blasticidin (10 µg ml<sup>-1</sup>), respectively, were inoculated in 96-multiwell plates  
165 containing 200 µl of L1 medium with 100 µg ml<sup>-1</sup> of nourseothricin or 10 µg ml<sup>-1</sup> blasticidin,  
166 depending on the diatom species, and subcultured every 5 days. Clonal lines from 96-well  
167 plates were screened by detecting mVenus fluorescence using a CytoFLEX S (Beckman  
168 Coulter) flow cytometer operated in plate mode. 48 clones of each expression system were  
169 screened for *T. pseudonana* and 12 for *P. tricornutum*. A 488 nm laser was used for  
170 fluorescence excitation; mVenus fluorescence was detected using a 525/40 nm filter and  
171 chlorophyll fluorescence was detected using 690/50 nm filter. 10,000 events were analyzed  
172 per sample. Three independent cell lines per construct with the highest median mVenus  
173 fluorescence readings were selected for full-scale experiments, including WT and empty  
174 vector controls.

175 **Experiments with transgenic diatom cultures.** Three replicates of each selected clone were  
176 inoculated in 5 ml of L1 medium (100 µg ml<sup>-1</sup> nourseothricin or 10 µg ml<sup>-1</sup> blasticidin) and  
177 grown for 3 days. Subsequently, cultures were upscaled to 50 ml L1 supplemented with the  
178 respective antibiotic for 5 days and these were used to inoculate cultures in L1 medium for  
179 sterol analysis experiments. Full-scale experiments were carried out in 200 ml flasks  
180 containing 120 ml of L1 medium and antibiotic under continuous light (150 µmol photons m<sup>-2</sup>  
181 s<sup>-1</sup>) and constant shaking (95 rpm). Cell density and mVenus fluorescence were monitored  
182 daily by sampling 200 µl from each culture and transferring it to a 96 well plate for high-  
183 throughput flow cytometry analysis. Pulse Amplitude Modulated (PAM) fluorometry was  
184 used to estimate photosynthetic activity by comparing fluorescence yield of PSII under  
185 ambient irradiance (F) and after application of a saturating pulse (F<sub>m</sub>) (Schreiber, 2004).  
186 After 48 hours of growth, biomass was harvested by centrifuging at 4000 g for 10 minutes.

187 Diatom pellets were washed with Milli-Q water to eliminate excess salt, freeze-dried to  
188 determine dry weight, and kept at  $-20^{\circ}\text{C}$  until sterol extraction.

189 **Extraction and analysis of sterols by GC-MS.** For sterol extraction, dry cell matter was  
190 heated in 1 mL of 10% KOH ethanolic solution at  $90^{\circ}\text{C}$  for one hour. Sterols were extracted  
191 from cooled material in three volumes of 400  $\mu\text{L}$  of hexane. An internal standard, 5a-  
192 cholestane, was added to each sample. Hexane fractions were dried under a gentle  $\text{N}_2$  stream,  
193 and derivatized with 50  $\mu\text{L}$  of 99% BSTFA + 1% TMCS (N,O-  
194 Bis(trimethylsilyl)trifluoroacetamide, Trimethylsilyl chloride) at  $70^{\circ}\text{C}$  for one hour. The  
195 resulting extractions were resuspended in 50  $\mu\text{L}$  of fresh hexane prior to GC-MS injection.

196 Gas chromatography/mass spectrometry (GC-MS) analysis was performed using an Agilent  
197 7890 instrument equipped with a HP-5 capillary column (30 m; 0.25 mm inner diameter, film  
198 thickness 0.25  $\mu\text{m}$ ) coupled to an Agilent quadrupole MS (5975 N) instrument. The following  
199 settings were used: oven temperature initially set to  $50^{\circ}\text{C}$ , with a gradient from  $50^{\circ}\text{C}$  to  
200  $250^{\circ}\text{C}$  ( $15.0^{\circ}\text{C min}^{-1}$ ), and then from  $250^{\circ}\text{C}$  to  $310^{\circ}\text{C}$  ( $8^{\circ}\text{C min}^{-1}$ , hold 10 min); injector  
201 temperature =  $250^{\circ}\text{C}$ ; carrier gas helium flow =  $0.9 \text{ mL min}^{-1}$ . A split-less mode of injection  
202 was used, with a purge time of 1 min and an injection volume of 5  $\mu\text{L}$ . Mass spectrometer  
203 operating conditions were as follows: ion source temperature  $230^{\circ}\text{C}$ ; quadrupole temperature  
204  $150^{\circ}\text{C}$ ; accelerating voltage 200 eV higher than the manual tune; and ionization voltage 70  
205 eV. Full scanning mode with a range from 50 to 650 Dalton was used.

206 Sterol peaks were identified based on retention time, mass spectrum, and representative  
207 fragment ions compared to the retention times and mass spectrum of authentic standards. The  
208 NIST (National Institute of Standards and Technology) library was also used as reference.  
209 The area of the peaks and deconvolution analysis was carried out using the default settings of  
210 the Automated Mass Spectral Deconvolution and Identification System AMDIS software  
211 (v2.6, NIST). Peak area measurements were normalized by both the weight of dry matter  
212 prior to extraction, and the within-sample peak area of the internal standard 5a-cholestane.  
213 Sterol standards used to calibrate and identify GC-MS results in this study included: cholest-  
214 5-en-3- $\beta$ -ol (cholesterol); (22E)-stigmasta-5,22-dien-3 $\beta$ -ol (stigmasterol); stigmast-5-en-3- $\beta$ -  
215 ol (sitosterol); campest-5-en-3- $\beta$ -ol (campesterol); (22E)-ergosta-5,22-dien-3- $\beta$ -ol  
216 (brassicasterol); (24E)-stigmasta-5,24-dien-3 $\beta$ -ol (fucosterol); 9,19-Cyclo-24-lanosten-3 $\beta$ -ol  
217 (cycloartenol);, 5- $\alpha$ -cholestane; and the derivatization reagent bis(trimethyl-silyl)

218 trifluoroacetamide and trimethylchlorosilane (99% BSTFA + 1% TMCS) and were obtained  
219 from Sigma-Aldrich, Australia.

220 **Fluorescence imaging.** Live diatom transformants expressing mVenus were imaged without  
221 fixative with a confocal laser scanning microscope (Nikon A1 Plus, Japan) and  
222 photomultiplier tube (PMT) detector. The 488-nm and 637-nm lasers were used for mVenus  
223 and chlorophyll autofluorescence, respectively. Gains on the detector were kept constant  
224 between samples and controls. Images were acquired with 60×/1.4 objective oil immersion  
225 objective and processed using imaging software NIS-Elements Viewer 4.0 (Nikon, Japan).

226 **Multiple sequence alignment and phylogenetic reconstruction.** Diatom homologue  
227 sequences were retrieved either from the Marine Microbial Eukaryote Transcriptome  
228 Sequencing Project (MMETSP) (Keeling *et al.*, 2014; Johnson *et al.*, 2019) database or from  
229 GenBank protein database (Table S2) using BLASTp search with *T. pseudonana* *HMGR* as  
230 the query sequence. The species names and corresponding MMETSP ID numbers are listed in  
231 Table S2. *HMGR* from yeast, mammals, and plants were used as outgroups. Sequences from  
232 outgroups (Table S2) were obtained from GenBank protein database (complete sequence in  
233 Supplementary Material). Multiple sequence alignments of the full-length protein sequences  
234 were performed by MAFFT version 7 program with default parameters and alignments were  
235 manually edited by exclusion of ambiguously aligned regions. The maximum likelihood tree  
236 phylogenetic tree was constructed using MEGA 6 with partial deletion option. The reliability  
237 of obtained phylogenetic tree was tested using bootstrapping with 1000 replicates. Prediction  
238 of transmembrane helices in *HMGR* from diatoms was carried out using the TMHMM Server  
239 v. 2.0 with default parameters (Krogh *et al.*, 2001). Conserved motifs in the selected  
240 sequences were identified by an InterProScan (Jones *et al.*, 2014) search against all available  
241 member databases, including Pfam (protein families) and SUPERFAMILY (structural  
242 domains).

243 **Statistical analysis.** All plots were generated using R: A language and environment for  
244 statistical computing. All experiments were conducted in triplicate. The analyses performed  
245 were Shapiro-Wilk to test normality, non-parametric Kruskal–Wallis test and Pairwise  
246 Wilcoxon Rank Sum Tests to calculate pairwise comparisons between group levels with  
247 corrections for multiple testing. Differences between groups were considered significant at  $p$   
248 < 0.05.



## 249 RESULTS

### 250 Identification of putative *HMGR* from *T. pseudonana* and *P. tricornutum*

251 In contrast to the recently discovered AltSQE, little is known about the diatom HMGR  
252 enzyme despite being a major regulatory step in sterol biosynthesis. Previous studies  
253 demonstrated that specific HMGR inhibitors alter isoprenoids metabolism in the diatoms *P.*  
254 *tricornutum*, *Haslea ostrearia* and *Rhizosolenia setigera* (Massé *et al.*, 2004; Conte *et al.*,  
255 2018). Given the presence of many unusual features in diatoms metabolism (Fabris *et al.*,  
256 2012; Pollier *et al.*, 2019; Jaramillo-Madrid *et al.*, 2020a) we analyzed the conservation of the  
257 HMGR sequence among all the diatom species with genomic or transcriptomics sequences  
258 available.

259 The amino acid sequence of *Arabidopsis thaliana* HMGR enzyme (AT1G76490) was used as  
260 query to search against the genome sequence of the diatoms *T. pseudonana* and *P.*  
261 *tricornutum* to identify the genes putatively encoding *HMGR*. Through this analysis, we  
262 identified a single copy of a putative *HMGR* gene located in chromosome 29 in *P.*  
263 *tricornutum* (Gene ID *Phatr3\_J16870*)(Fabris *et al.*, 2014) and chromosome 4 in *T.*  
264 *pseudonana* (Gene ID *Thaps\_33680*). In model eukaryotic organisms, HMGR is  
265 characterized by the presence of an N-terminal membrane domain and a C-terminal catalytic  
266 region. Sequence alignment analysis revealed differences in membrane domain location  
267 among model organisms, while the catalytic region is conserved (Fig. 2, S3). The C-terminal  
268 catalytic domain of HMGR was highly conserved across all the organisms analyzed (Fig. 2).  
269 The catalytic residues Glu559, Asp767, and His866 (Friesen & Rodwell, 2004; Li *et al.*,  
270 2014), were also found to be present and conserved in *T. pseudonana* and *P. tricornutum*  
271 (Fig. S3). HMGRs from *Saccharomyces cerevisiae* and *Homo sapiens* possess a sterol  
272 sensing domain (SSD) in the transmembrane N-terminal region, which is involved in sterol  
273 homeostasis (Burg & Espenshade, 2011), therefore, we analyzed HMGR transmembrane  
274 region in diatoms to identify similarities with other model organisms. Most of the analyzed  
275 HMGR sequences from diatoms possess three trans-membrane helices in the N-terminal  
276 domain, except a few with two or none domains predicted (Table S2). In comparison, plants  
277 usually have two domains (Li *et al.*, 2014). We found seven transmembrane domains in *S.*  
278 *cerevisiae* and five in *Homo sapiens* (Table S2). We did not detect similarities with known  
279 yeast and mammals SSDs in the N-terminal region in any of the diatoms analyzed (Fig. 2).

## 280 **Phylogenetic analysis of HMGR and conserved protein domains**

281 Based on the alignments of full-length HMGR protein sequences of twenty-eight diatom  
282 species retrieved from whole genome and transcriptome assemblies, a maximum likelihood  
283 phylogenetic tree was constructed to study evolutionary relationship of HMGR protein  
284 sequence among diatoms (Fig. 2). We designated HMGR from yeast, mammals, and plants as  
285 outgroups. Pennate and centric diatoms were divided into two different clades (Fig. 2). As  
286 expected, HMGR from diatoms of the same genus tended to cluster together. Species from  
287 the order *Thalassiosirales* which includes *Thalassiosira* and *Skeletonema* genus are grouped  
288 together (Fig. 2). Similarly, HMGR from the diatoms *P. tricornutum* and *Fistulifera solaris*  
289 that belong to the *Naviculales* order appear to be closely related (Fig. 2). Interestingly, we did  
290 not find a match for HMGR in the transcriptomic sequences of the diatoms: *Chaetoceros*  
291 *muelleri*, as previously reported (Jaramillo-Madrid *et al.*, 2020a), *Chaetoceros brevis*,  
292 *Chaetoceros debilis* and *Chaetoceros curvisetus* (Table S2).

## 293 **Expression and subcellular localization of putative HMGR and tHMGR**

294 While the core reactions in sterol synthesis being conserved in *T. pseudonana* and *P.*  
295 *tricornutum* (Jaramillo-Madrid *et al.*, 2020a), both diatoms produce a distinctive profile of  
296 sterol compounds which varies differently upon changing environmental conditions and  
297 chemical inhibitors treatment (Jaramillo-Madrid *et al.*, 2020a,b). Additionally, the sterol  
298 metabolism of the centric diatom *T. pseudonana* has not been explored to the same depth as  
299 the model pennate *P. tricornutum*. To investigate the subcellular localization and evaluate the  
300 effect of overexpression of the rate-limiting enzyme HMGR on sterol accumulation, *T.*  
301 *pseudonana* and *P. tricornutum* were transformed with episomes containing their respective  
302 putative *HMGR* copy fused to mVenus, driven by a constitutive promoter (Fig. 1, Fig. S1,S2).  
303 Episomes are maintained extra-chromosomally and therefore enable more consistent  
304 expression required for metabolic studies (George *et al.*, 2020). The trans-membrane domains  
305 of HMGR enzymes in mammals and yeast have been reported to contain a sterol sensing  
306 domain (SSD) that regulates expression and degradation of the enzyme (Kuwabara &  
307 Labouesse, 2002). Although our results suggest that diatom HMGRs lacks a SSD (Fig. 2), we  
308 designed an N-terminal truncated version, tHMGR, to evaluate whether an unknown  
309 regulatory sequence is present in N-terminal region affecting activity of HMGR in diatoms.  
310 This *tHMGR* sequence encoded solely the C-terminal catalytically active region of the  
311 enzyme.

312 The mVenus fluorescence was measured by flow cytometry and used as an indirect proxy of  
313 enzyme expression, since each expression system was C-terminal fused with mVenus protein.  
314 Three clones per expression system with the highest median mVenus signal were chosen for  
315 full scale experiments. In *P. tricornutum*, time course median mVenus fluorescence in  
316 mVenus control clones was 10-fold compared to WT, which confirms the effectiveness of the  
317 chosen promoter (Fig. S4). Conversely, median mVenus fluorescence clones expressing  
318 HMGR-mVenus and tHMGR-mVenus was 1.3-fold compared to WT, indicating an apparent  
319 regulation process occurring over the fused proteins (Fig. S4). In *T. pseudonana*, median  
320 mVenus fluorescence in HMGR-mVenus, tHMGR-mVenus, and mVenus control clones  
321 appear similar to WT signal, suggesting that low expression was achieved using the *EF2*  
322 promoter (Fig. S5). However, confocal microscopy images confirmed expression of mVenus  
323 in both diatom species (Fig. 3). Different cellular localizations were observed for each  
324 genetic construct. Images of control cell lines showed mVenus expression localized in the  
325 cytoplasm (Fig. 3), while no mVenus fluorescence was detected in WT diatoms. mVenus  
326 fluorescence in exconjugants overexpressing HMGR-mVenus was detected around the  
327 chloroplast, suggesting that putative HMGR is localized in the endoplasmic reticulum (ER),  
328 which tightly surrounds the chloroplasts in diatoms (Kroth, 2002) (Liu *et al.*, 2016).  
329 Conversely, tHMGR-mVenus localises in the cytoplasm, consistent with truncation of the N-  
330 terminal membrane domain (Fig. 3).

### 331 **Influence of HMGR and tHMGR expression on sterol levels in *T.*** 332 ***pseudonana* and *P. tricornutum***

333 Although expression of transgenes appears to be low according to mVenus fluorescence  
334 levels, we proceeded to identify changes in sterol profiles in the transgenic lines. Sterols were  
335 extracted from exconjugants in the mid-exponential phase, which was the time period with  
336 the maximum observed mVenus fluorescence (Fig. S4,S5) with enough biomass to sample  
337 for sterol extraction (determined to be 48 hours growth for *T. pseudonana* and 72 hours for *P.*  
338 *tricornutum*). After 75 hours, cell density of *P. tricornutum* HMGR-mVenus and tHMGR-  
339 mVenus R was 1.4 times lower than WT, while no growth impairment was observed for  
340 mVenus exconjugants (Fig. S6). No differences in chlorophyll levels and in effective  
341 quantum yield of PSII were observed in *P. tricornutum* exconjugants (Fig. S7, S8). Similarly,  
342 no growth impairment, chlorophyll levels or differences in effective quantum yield of PSII  
343 compared to WT were observed for *T. pseudonana* exconjugants (Fig. S9, S10, S11).

344 In *P. tricornutum* overexpressing HMGR-mVenus, squalene levels were ten times higher in  
345 HMGR-mVenus exconjugants than in WT and mVenus controls. Moreover, a 3-fold increase  
346 in cycloartenol and a 2.5-fold obtusifoliol accumulation was detected compared to WT (Fig.  
347 4). However, we did not detect the intermediate 2,3 epoxysqualene. Levels of end-point sterol  
348 campesterol decreased 2-fold, whereas no significant differences were observed in  
349 brassicasterol, the most abundant sterol in *P. tricornutum*. We detected traces levels of end  
350 point sterol 24- methylcholesta-5,24(24')-dien-3 $\beta$ -ol in the WT and mVenus controls, which  
351 is typically found in centric diatoms and has not been reported in *P. tricornutum* (Rampen *et*  
352 *al.*, 2010). Levels of this end-point sterol were 17 times higher in two independent  
353 exconjugant lines expressing HMGR-mVenus. Total sterol levels were not affected despite  
354 significant changes in individual sterols (Fig. 4).

355 Since expression of mVenus, HMGR-mVenus, and tHMGR-mVenus in *T. pseudonana* did  
356 not appear to be effective based on flow cytometry data (Fig. S5), observed changes on sterol  
357 profiles may not be directly related to the overexpression of the targeted enzymes. *T.*  
358 *pseudonana* cell lines transformed with *HMGR*-mVenus construct exhibited a decrease in the  
359 minor sterols fucosterol and isofucosterol relative to WT control (Fig. S12). However,  
360 isofucosterol reduction was also detected in the control expressing only mVenus (Fig. S12).  
361 No intermediates were detected. Total sterol levels remained similar in the three independent  
362 cell lines studied; no significant differences were observed in comparison to the WT control  
363 (Fig. S12).

364 Expressing the catalytically active region of their putative HMGRs (tHMGR) was expected to  
365 reduce regulatory mechanisms that may affect HMGR activity in diatoms. In *P. tricornutum*,  
366 sterol changes in cell lines expressing tHMGR-mVenus were similar to those expressing  
367 HMGR-mVenus, with campesterol levels 2-fold less abundant than in HMGR-mVenus  
368 transformants (Fig. 4). Traces of 24- methylcholesta-5,24(24')-dien-3 $\beta$ -ol were detected as in  
369 HMGR-mVenus expressing lines, 10 times higher compared to WT. We also detected an  
370 increase in the intermediates squalene (4-fold), cycloartenol (1.8-fold) and obtusifoliol (2-  
371 fold) compared to WT (Fig. 4). Squalene levels accumulated in HMGR-mVenus clones were  
372 statistically different to tHMGR clones, being 2.5 times higher in HMGR-mVenus expressing  
373 lines (Fig. 4). No changes in total sterol levels and brassicasterol were observed (Fig. 4).

374 No changes in total sterol content were observed in *T. pseudonana* cell lines transformed with  
375 *tHMGR*-mVenus (Fig. S12). No intermediates were detected. Significant changes in less

376 abundant sterol compounds occurred in transformants including controls expressing only  
377 mVenus.

### 378 **Heterologous expression of a Stramenopile putative SQE**

379 Diatoms have been reported to employ an alternative squalene epoxidase (AltSQE) that is  
380 different from the conventional SQE found in other eukaryotes (Pollier *et al.*, 2019). It has  
381 been observed that artificially alter the expression of this enzyme in *P. tricornutum* is  
382 particularly challenging (Pollier *et al.*, 2019), suggesting that a strict regulation of  
383 endogenous AltSQE may be occurring as is the case for SQE in (Nagai *et al.*, 2002b; Gill *et*  
384 *al.*, 2011). Therefore, we hypothesized that the expression of a heterologous, conventional  
385 SQE that could override endogenous regulation, would influence final sterol levels.

386 Consequently, a heterologous putative SQE from the Stramenopile *N. oceanica* (*NoSQE*,  
387 Nanoce ID 521007) was expressed in the diatoms *T. pseudonana* and *P. tricornutum*.

388 Confocal microscopy images showed that mVenus fluorescence in NoSQE–mVenus  
389 transformants was similarly located to HMGR-mVenus, indicating ER localization in both  
390 diatom species (Fig. 3). Chlorophyll and mVenus fluorescence intensity were comparable to  
391 those of diatoms overexpressing putative HMRG-mVenus and tHMGR-mVenus (see 3.2  
392 section) (Fig. S4, S5, S7, S10).

393 Total sterol content of *T. pseudonana* and *P. tricornutum* exconjugants transformed with  
394 *NoSQE*-mVenus constructs remained unchanged compared to WT and mVenus controls (Fig.  
395 4, S12). However, in *P. tricornutum* overexpressing *NoSQE*-mVenus we observed significant  
396 differences in both end-point sterols and sterol intermediates. Downstream intermediates  
397 cycloartenol and obtusifoliol exhibited a 1.8-fold increase compared to WT control (Fig. 4),  
398 while no differences in squalene were observed. The intermediate 2,3 epoxysqualene was not  
399 detected in either diatom species. In contrast to HMGR-mVenus overexpression, campesterol  
400 increased by 3-fold (Fig. 4). However, the major end-point sterol brassicasterol remained  
401 unchanged.

## 402 DISCUSSION

### 403 **HMGR is largely conserved among diatoms and lacks a** 404 **conventional sterol sensing domain**

405 To investigate sequence characteristics of the rate-limiting HMGR enzyme in diatoms, we  
406 identified the genes putatively encoding the enzyme HMGR from 28 different diatom  
407 species. While a putative HMGR homologue was detected in 28 of the diatom species, the  
408 failure to detect HMGR transcripts in transcriptomic sequences of some diatoms belonging to  
409 *Chaetoceros* genus (Table S2), may support the hypothesis that those diatoms may solely  
410 rely on the MEP pathway to produce isoprenoids (Jaramillo-Madrid *et al.*, 2020a). The lack  
411 of obvious HMGR transcripts may also have occurred due to low expression or down-  
412 regulation of these and other genes related to the MVA pathway under the conditions in  
413 which RNA sequencing was performed. Nevertheless, conserved HMGR genes were detected  
414 in many diatoms for which genomic or transcriptomic data are available. These HMGR genes  
415 diverge between pennate and centric diatoms (Fig. 2), which are separated by 90 million  
416 years of divergent evolution (Bowler *et al.*, 2008). Presence of putative HMGR in most of the  
417 diatom species analysed is an indicator of presence of MVA pathway operating in diatoms, as  
418 it was previously reported by transcriptomics analysis in the diatoms *P. tricornutum* and *T.*  
419 *pseudonana* (Jaramillo-Madrid *et al.*, 2020a). The MEP pathway appears functional in the  
420 two model diatoms, which indicates that both cytosolic -MVA and plastidial MEP are  
421 simultaneously operating in *P. tricornutum* and *T. pseudonana*, as it is the case in plants  
422 (Vranova *et al.*, 2013; Jaramillo-Madrid *et al.*, 2020a). Presence of both pathways could  
423 represent an advantage for terpenoids production, due to a potentially higher metabolic flux  
424 and greater pool of available precursors (Vavitsas *et al.*, 2018).

425 The organization of the N-terminal transmembrane domain of diatom HMGR differs  
426 significantly to their mammals and yeast counterparts. While most of the diatoms analyzed in  
427 this study presented three transmembrane domains (Fig. 2, Table S2), mammals possess five  
428 and yeast seven. The presence of transmembrane domains is likely related to anchoring the  
429 protein within the ER membrane, but the consequences of this structural difference for  
430 diatom HMGR in terms of regulation of enzyme expression and activity are unknown. In  
431 mammals and yeast, HMGR possess a SSD involved in sensing oxysterol molecules that  
432 activate feedback regulation leading to degradation of the protein (Burg & Espenshade, 2011)

433 (Theesfeld *et al.*, 2011). Despite the lack of a conventional sterol-sensing domain in the  
434 HMGR enzymes of diatoms (Fig. 2), several studies have shown a transcriptional response of  
435 MVA enzymes to perturbations in sterol metabolism (D'Adamo *et al.*, 2019)(Jaramillo-  
436 Madrid *et al.*, 2020a). The fact that in diatom sequences do not possess a canonical SSD  
437 opens several possibilities, including that HMGR may not play the same regulatory role in  
438 diatoms as it does in other organisms; i.e. the MVA pathway may be regulated through a  
439 different mechanism that does not involve *HMGR* feedback regulation. Another possible  
440 explanation is that HMGRs of diatoms and plants possess a non-conventional SSD sequence,  
441 a motif with different characteristics than the already described in mammals and yeast.

### 442 **HMGR overexpression lead to accumulation of sterol pathway** 443 **intermediates in *P. tricornutum***

444 In this study, we investigated the response of diatoms to genetic targeting of sterol  
445 biosynthesis, through manipulation of the MVA rate-limiting enzyme HMGR. The  
446 fluorescent localization of extra-chromosomally expressed HMGR-mVenus to the membrane  
447 surrounding the plastid is consistent with ER localization of proteins, including AltSQE, from  
448 previous studies in *P. tricornutum* (Kroth, 2002; Pollier *et al.*, 2019) and *T. pseudonana*  
449 (Sheppard *et al.*, 2010). Therefore, our study provides evidence that diatom HMGR is  
450 localized to the ER, just as in mammals, yeast, and higher plants (Leivar *et al.*, 2005; Burg &  
451 Espenshade, 2011). The truncation of the native HMGR sequence resulted in cytoplasmic  
452 localization, demonstrating that the signals for protein targeting are in the N-terminal portion  
453 of the protein sequence.

454 In some cases, overexpression of HMGR has been showed to slightly increase sterol and  
455 intermediates production in other organisms. The overexpression of HMGR from the plant  
456 *Panax ginseng* in *Arabidopsis thaliana* resulted in a nearly two-fold increase of sitosterol,  
457 campesterol, and cycloartenol, while levels of squalene and stigmasterol did not significantly  
458 change (Kim *et al.*, 2014). In a more recent study, Lange *et al.* (2015) independently over-  
459 expressed all genes participating in the MVA pathway, obtaining a significant increase in  
460 total sterols when expressing HMGR (3.4-fold) and 3-hydroxy-3-methylglutaryl-co-enzyme-  
461 A synthase, HMGS (2-fold). The overexpression of native HMGR in *Arabidopsis* (*HMG1*)  
462 led to high levels of HMGR mRNA, but only a slight increase in HMGR activity, and no  
463 changes in leaf sterol levels (Re *et al.*, 1995). Heterologous expression of HMGR from *Hevea*

464 *brasiliensis* in tobacco, however, showed an increase in HMGR transcript and total sterol  
465 from leaves (Schaller *et al.*, 1995).

466 In this study, overexpression of endogenous putative HMGR-mVenus in *P. tricornutum*  
467 resulted in an increased accumulation of the intermediates squalene, cycloartenol, and  
468 obtusifoliol and decrease in the end-point sterol campesterol. However, we did not detect 2,3  
469 epoxysqualene, indicating possible differences on the catalytic rates of the enzymes squalene  
470 epoxidase and cycloartenol cyclase (Fig. 1). While accumulation of squalene is detectable,  
471 2,3 epoxysqualene seems to be rapidly converted into cycloartenol. Accumulation of 2,3  
472 epoxysqualene has been reported before by chemically inhibiting cycloartenol cyclase with  
473 Ro 48-8071 (Fabris *et al.*, 2014; Jaramillo-Madrid *et al.*, 2020a).

474 Accumulation of intermediates suggest that in *P. tricornutum*, overexpression of HMGR-  
475 mVenus boosted production of presumably MVA-derived intermediates, IPP and DMAPP  
476 that are subsequently converted into squalene (Fig. 1). Even though MVA products also serve  
477 as building blocks of other isoprenoids (Lange *et al.*, 2000), perturbation of the rate-limiting  
478 step catalyzed by HMGR was sufficient to cause accumulation of downstream intermediates  
479 committed to sterol biosynthesis, such squalene, cycloartenol, and obtusifoliol. However, this  
480 metabolic bottleneck did not translate into overall increase of sterol compounds; on the  
481 contrary, levels of the end-point sterol campesterol were reduced and brassicasterol levels  
482 remained unchanged.

483 Although, fluorescence levels in *P. tricornutum* exconjugants expressing the target enzymes  
484 were considerably lower compared to the expression of mVenus alone (Fig. S5), phenotypic  
485 changes in terms of sterol profiles indicates that the level of expression was sufficient to  
486 cause perturbations in the metabolic pathway (Fig. 4). Moreover, since all the enzymes  
487 expressed are membrane proteins, as confirmed by confocal microscopy (Fig. 3, S3),  
488 fluorescent signal could have been hindered and no direct correlation with expression could  
489 be assumed. The absence of detectable sterol pathway intermediates in *T. pseudonana*  
490 transformants (Fig. S12) may be related with the promoter chosen for overexpression of the  
491 target enzymes, as higher expression may be necessary to trigger the accumulation of  
492 intermediates observed in *P. tricornutum*. Fluorescence signal for mVenus control in *P.*  
493 *tricornutum* (*Phatr3\_J49202* promoter) was around ten times higher than in *T. pseudonana*  
494 mVenus control (*EF2* promoter) throughout the full-scale experiment (Fig. S4, S5),  
495 suggesting that use of stronger promoters for metabolic engineering of *T. pseudonana* should



496 be considered. Levels of fucosterol and isofucosterol decreased in *T. pseudonana* lines  
497 transformed with a putative endogenous HMGR-mVenus (Fig. S12). However, since similar  
498 results were observed for isofucosterol in the control expressing only mVenus, it is uncertain  
499 if the observed reduction was a direct consequence of putative HMGR-mVenus  
500 overexpression alone. No intermediates were detected in *T. pseudonana* overexpressing  
501 putative HMGR-mVenus. End-point sterols 24-methylenecholesta-5,24(24')-dien-3 $\beta$ -ol,  
502 cholesterol, campesterol, and total sterol levels were statistically indistinguishable from those  
503 obtained with untransformed WT and mVenus control transformants (Fig. S12).

504 Results suggest that there are several regulation points in sterol biosynthesis in diatoms,  
505 including the MVA pathway, conserved core, and specialized downstream reactions. It is also  
506 possible that MEP responds to an alteration on the MVA pathway, rebalancing IPP and  
507 DMAPP pools, and metabolic cross-talk between these two pathways could potentially occur  
508 in diatoms. Despite the core reactions in sterol synthesis being conserved in *T. pseudonana*  
509 and *P. tricornutum* (Jaramillo-Madrid *et al.*, 2020a), we observed different responses in lines  
510 overexpressing putative *HMGR*-mVenus of these two model diatoms (Fig. 4, S12). As  
511 previously mentioned, these results might be related with the promoters chosen for each  
512 species, or could indicate differences on sterol regulation between centric and pennate  
513 diatoms that correlates with divergence between putative *HMGR* from both diatom groups  
514 (Fig. 2). Differences in sterol profiles from *T. pseudonana* and *P. tricornutum* have been  
515 suggested to occur in downstream reactions of sterol synthesis (Jaramillo-Madrid *et al.*,  
516 2020a), and responses to alteration on a key point of MVA pathway suggest possible  
517 divergences in regulation mechanisms.

## 518 **Overexpression of tHMGR does not circumvent native regulatory** 519 **mechanisms**

520 Additional strategies have been developed to overcome regulation by HMGR and increase  
521 MVA carbon flux in other eukaryotes. Truncation of HMGR to remove N-terminal  
522 membrane and SSD domain was first reported in plants and yeast with the aim to express  
523 only the catalytic domain of HMGR and avoid regulatory effects (Donald *et al.*, 1997;  
524 Polakowski *et al.*, 1998). Although HMGRs of plants do not contain an SSD sequence (Fig.  
525 2), expression of an N-terminal truncated HMGR has been reported to increase sterol levels.  
526 Expression of tHMGR from hamster in tobacco resulted in augmented sterol content in leaf  
527 tissue (Chappell *et al.*, 1995). Constitutive expression of tHMGR from *Hevea brasiliensis* in

528 tobacco resulted in an increasing 11-fold of seed HMGR activities and 2.4-fold increase in  
529 total seed sterol content (Harker *et al.*, 2003). However, overexpression of a tHMGR has not  
530 always been effective at altering sterol content; the overexpression of tHMGR in yeast  
531 resulted in accumulation of squalene, no changes in ergosterol, the final sterol in yeast  
532 (Donald *et al.*, 1997; Polakowski *et al.*, 1998). Likewise, in this study we did not observe a  
533 statistically significant alteration in total sterols of *T. pseudonana* and *P. tricornutum* after  
534 constitutive expression of a tHMGR-mVenus (Fig. 4, S12). Yet, accumulation of the  
535 intermediates squalene, cycloartenol, and obtusifoliol was observed in *P. tricornutum*.  
536 Interestingly, levels of those intermediates were higher when expressing HMGR-mVenus,  
537 suggesting that truncation may have affected enzyme activity, performance, or access to  
538 substrates. Although we observed changes in intermediates and minor sterol levels in *P.*  
539 *tricornutum* expressing HMGR-mVenus and tHMGR-mVenus, total sterol levels remained  
540 unchanged. These results suggest that diatoms have a tight sterol regulation system that may  
541 not be related to the conventional regulation model that involves SSD but rather a complex  
542 system with several regulation points not only in the MVA pathway but further down the  
543 sterol metabolic pathway.

#### 544 **Levels of end-point campesterol increased after heterologous expression of** 545 **NoSQE in *P. tricornutum***

546 Diatoms possess a distinct AltSQE (Pollier *et al.*, 2019) catalyzing the conversion of squalene  
547 into 2,3 epoxysqualene which is then transformed into cycloartenol, the first committed step  
548 towards the production of steroids (Fig. 1). Whether the presence of an AltSQE confers  
549 diatoms and other microeukaryotes with specific biological advantages is not yet known.  
550 Similarly, AltSQE and SQE are mutually exclusive and, to date, no organisms have been  
551 found to naturally harbor both (Pollier *et al.*, 2019).

552 The genetic manipulation of SQE and squalene synthase, SQS, has been extensively used for  
553 enhanced production of squalene and triterpenoids (Lee *et al.*, 2004; Dong *et al.*, 2018)  
554 (Gohil *et al.*, 2019). Point mutations in the SQE gene (ERG1) in yeast resulted in  
555 accumulation of squalene (Garaiova *et al.*, 2014). Similarly, accumulation of squalene was  
556 observed in the green microalgae *Chlamydomonas reinhardtii* after knocking-down the SQE  
557 gene, while co-transformation lines with SQE-overexpression and SQE-knockdown yielded  
558 similar amounts of squalene (Kajikawa *et al.*, 2015).

559 This is the first study to investigate the response of diatoms to the expression of a  
560 conventional SQE. We did not observe any significant changes in growth and photosynthetic  
561 phenotypes of *T. pseudonana* and *P. tricornutum* expressing heterologous NoSQE (Fig. S6-  
562 S11). This suggest that in diatoms there is no apparent toxicity or physiological reason for the  
563 mutual exclusivity between AltSQE and conventional SQE. Confocal microscopy images of  
564 lines expressing NoSQE-mVenus fusion proteins, revealed that heterologous NoSQE was  
565 proximal to the chloroplasts, indicating that diatoms could recognize the ER signal peptide on  
566 the heterologous NoSQE, localizing it in the ER membrane (Fig. 3, S3), just as the  
567 endogenous AltSQE (Pollier et al., 2019) and native SQE enzymes are in other species (Leber  
568 et al., 1998; Laranjeira et al., 2015).

569 Significant accumulation of cycloartenol (1.8-fold) and obtusifoliol (1.8-fold) intermediates,  
570 but not of 2,3 epoxysqualene was obtained for *P. tricornutum* lines expressing NoSQE-  
571 mVenus (Fig. 4b). These intermediates occur after the formation of 2,3 epoxysqualene, which  
572 is the product of the reaction catalyzed by SQE (Fig. 1). As expected, we did not observe  
573 increased accumulation of squalene, which is the substrate for SQE, contrary to accumulation  
574 obtained by expressing HMGR-mVenus which is upstream of squalene production (Fig. 1).  
575 Nevertheless, heterologous expression of NoSQE-mVenus resulted in a 2-fold increase of  
576 campesterol, an end-point sterol. Accumulation of intermediates was higher in *P. tricornutum*  
577 cell lines expressing HMGR compared to those expressing NoSQE-mVenus (Fig. 4a). This  
578 indicates that intermediates accumulated by MVA pathway manipulation (i.e. HMGR) do not  
579 necessarily increase the flux to brassicasterol, suggesting that sterol regulation is occurring at  
580 the conserved core point and at other points further down the metabolic pathway. In  
581 particular, this might suggest that in *P. tricornutum* the epoxidation of squalene might be  
582 involved in pathway flux modulation, as observed in mammals (Nagai et al., 2002b; Gill et  
583 al., 2011), and that, to complete the scenario suggested by the results obtained by expressing  
584 NoSQE, it is plausible that an additional pathway checkpoint exists at the level of the C22-  
585 desaturation (E.C 1.14.19.41, Phatr3\_J51757) (Fabris et al., 2014). When treated with  
586 fluconazole and fenpropimorph, inhibitors targeting upstream of campesterol, the  
587 transcription of *Phatr3\_J51757* significantly increases (Jaramillo-Madrid et al., 2020a). This  
588 further supports the hypothesis that the last reaction in sterol synthesis could be a highly  
589 regulated point to maintain stable sterol levels in the cell. These results suggest that to  
590 observe changes in end-point sterol compounds, increasing the precursors pool is not enough;  
591 genetic manipulation should target other points further down in the metabolic pathway, such

592 as committed steps in sterol synthesis. A future co-expression approach to increase end-point  
593 sterol compounds in *P. tricornutum* could involve simultaneous expression of enzymes in the  
594 conserved core (i.e. SQE, AltSQE, cycloartenol synthase) and enzymes further down such as  
595 sterol C-22 desaturase. Similar co-expression approaches for manipulation of sterol levels in  
596 diatoms has not been reported but has been used to increase triterpenoid production in other  
597 organisms (Lange *et al.*, 2015; Zhang *et al.*, 2017; Bröker *et al.*, 2018; Dong *et al.*, 2018).

## 598 **Conclusions**

599 The results obtained in this study demonstrate the effectiveness of extra-chromosomal  
600 expression of key enzymes involved in sterol synthesis to influence levels of specific sterol  
601 compounds. We confirmed reported advantages of the use of extra-chromosomal episomes  
602 transformed via conjugation such as expression consistency among clones (Fig. S4-S11) and  
603 no random genome integration (George *et al.*, 2020). Additionally, we demonstrated the  
604 convenience of a modular assembling systems as uLoop (Pollak *et al.*, 2019) to build  
605 versatile genetic constructs for a functional genetics study with multiple species.

606 Furthermore, we applied reproducible genetic transformation methods for extra-chromosomal  
607 and heterologous expression to provide important insights into the metabolic bottleneck and  
608 pathway-level regulation of sterol synthesis in diatoms. We obtained accumulation of sterol  
609 pathway intermediates by overexpression of HMGR-mVenus, indicating possible metabolic  
610 bottleneck(s) downstream of the MVA pathway that may limit flux into end-point sterols.  
611 Accumulation of pathway intermediates is interesting from a biotechnological perspective, as  
612 an increased intermediate pool could be used by heterologous pathways plugged into  
613 endogenous (tri)terpenoid synthesis, allowing production of other high-value terpenoids as  
614 geraniol (Fabris *et al.*, 2020).

615 Whilst significant accumulation of intermediates participating in sterol synthesis was  
616 observed in *P. tricornutum* transformants, *T. pseudonana* and *P. tricornutum* transformants  
617 did not appear to produce different levels of total sterols. It is presumed that several levels of  
618 regulation could be affecting the expression, localization, lifetime, and activities of  
619 introduced genes. Further research into the regulatory responses of diatoms to heterologous  
620 overexpression may provide further insights into these processes and improve strategies for  
621 more informed metabolic engineering approaches.

## 622 **Acknowledgements**

623 A.C.J.M. was supported by the UTS International Research Scholarship and President's  
624 Scholarship, as well as a Scholarship from the non-profit Colfuturo Foundation of Colombia.  
625 J.A. is the recipient of an Australian Research Council Discovery Early Career Award  
626 (DE160100615) funded by the Australian Government. M.F. is supported by a CSIRO  
627 Synthetic Biology Future Science Fellowship, co-funded by CSIRO and the University of  
628 Technology Sydney. We wish to thank Dr. Unnikrishnan Kuzhiumparambil, Taya Lapshina  
629 and UTS Microbial Imaging Facility for methodological guidance.

## 630 **Author Contributions**

631 A.C.J.M. designed and performed all experiments and wrote the manuscript. J.A. designed,  
632 advised and materially supported experiments, performed bioinformatics, and assisted in  
633 writing. R.A. advised experiments, reviewed and assisted in writing. M.F. advised  
634 experiments, reviewed and assisted in writing. P.J.R. advised and materially supported  
635 experiments.

636

## 637 **REFERENCES**

- 638 **Aldini R, Micucci M, Cevenini M, Fato R, Bergamini C, Nanni C, Cont M, Camborata**  
639 **C, Spinozzi S, Montagnani M, et al. 2014.** Antiinflammatory effect of phytosterols in  
640 experimental murine colitis model: prevention, induction, remission study. *PLoS One* **9**:  
641 e108112.
- 642 **Armbrust EV. 2009.** The life of diatoms in the world's oceans. *Nature* **459**: 185–192.
- 643 **Athanasakoglou A, Grypioti E, Michailidou S, Ignea C, Makris AM, Kalantidis K, Mass**  
644 **G, Argiriou A, Verret F. 2019.** Isoprenoid biosynthesis in the diatom *Haslea ostrearia*. *New*  
645 *Phytologist* **222**: 230–243.
- 646 **Bansal S, Narnoliya LK, Mishra B, Chandra M. 2018.** HMG-CoA reductase from  
647 Camphor Tulsi (*Ocimum kilimandscharicum*) regulated MVA dependent biosynthesis of  
648 diverse terpenoids in homologous and heterologous plant systems. *Scientific Reports* **8**: 1–15.
- 649 **Borowitzka MA. 2013.** High-value products from microalgae — their development and  
650 commercialisation. *Journal of Applied Phycology* **25**: 743–756.
- 651 **Bröker JN, Müller B, van Deenen N, Prüfer D, Gronover CS. 2018.** Upregulating the  
652 mevalonate pathway and repressing sterol synthesis in *Saccharomyces cerevisiae* enhances  
653 the production of triterpenes. *Applied microbiology and biotechnology* **102**: 6923–6934.
- 654 **Burg JS, Espenshade PJ. 2011.** Regulation of HMG-CoA reductase in mammals and yeast.  
655 *Progress in Lipid Research* **50**: 403–410.
- 656 **Chappell J, Wolf F, Proulx J, Cuellar R, Saunders C. 1995.** Is the reaction catalyzed by 3-  
657 hydroxy-3-methylglutaryl coenzyme A reductase a rate-limiting step for isoprenoid

- 658 biosynthesis in plants? *Plant Physiology* **109**: 1337–1343.
- 659 **Conte M, Lupette J, Seddiki K, Meï C, Dolch L-J, Gros V, Barette C, Rébeillé F, Jouhet**  
660 **J, Maréchal E. 2018.** Screening for biologically annotated drugs that trigger triacylglycerol  
661 accumulation in the diatom *Phaeodactylum*. *Plant physiology* **177**: 532–552.
- 662 **D’Adamo S, Schiano di Visconte G, Lowe G, Szaub-Newton J, Beacham T, Landels A,**  
663 **Allen MJ, Spicer A, Matthijs M. 2019.** Engineering the unicellular alga *Phaeodactylum*  
664 *tricornutum* for high-value plant triterpenoid production. *Plant Biotechnology Journal* **17**:  
665 75–87.
- 666 **Diner RE, Bielinski VA, Dupont CL, Allen AE, Weyman PD. 2016.** Refinement of the  
667 diatom episome Maintenance sequence and Improvement of Conjugation-Based dNA  
668 delivery Methods. *Frontiers in Bioengineering and Biotechnology* **4**: 1–12.
- 669 **Donald KA, Hampton RY, Fritz IB. 1997.** Effects of overproduction of the catalytic  
670 domain of 3-hydroxy-3- methylglutaryl coenzyme A reductase on squalene synthesis in  
671 *Saccharomyces cerevisiae*. *Applied and Environmental Microbiology* **63**: 3341–3344.
- 672 **Dong L, Pollier J, Bassard J, Ntallas G, Almeida A, Lazaridi E, Khakimov B, Arendt P,**  
673 **Souza L, Oliveira D, et al. 2018.** Co-expression of squalene epoxidases with triterpene  
674 cyclases boosts production of triterpenoids in plants and yeast. *Metabolic Engineering* **49**: 1–  
675 12.
- 676 **Dufourc EJ. 2008.** Sterols and membrane dynamics. *Journal of Chemical Biology* **1**: 63–77.
- 677 **Espenshade PJ, Hughes AL. 2007.** Regulation of Sterol Synthesis in Eukaryotes. *Annual*  
678 *Review of Genetics* **41**: 401–427.
- 679 **Fabris M, George J, Kuzhiumparambil U, Lawson CA, Jaramillo-Madrid AC,**  
680 **Abbriano RM, Vickers CE, Ralph P. 2020.** Extrachromosomal Genetic Engineering of the  
681 Marine Diatom *Phaeodactylum tricornutum* Enables the Heterologous Production of  
682 Monoterpenoids. *ACS Synthetic Biology* **9**: 598–612.
- 683 **Fabris M, Matthijs M, Carbonelle S, Moses T, Pollier J, Dasseville R, Baart GJE,**  
684 **Vyverman W, Goossens A. 2014.** Tracking the sterol biosynthesis pathway of the diatom  
685 *Phaeodactylum tricornutum*. *New Phytologist* **204**: 521–535.
- 686 **Fabris M, Matthijs M, Rombauts S, Vyverman W, Goossens A, Baart GJE. 2012.** The  
687 metabolic blueprint of *Phaeodactylum tricornutum* reveals a eukaryotic Entner-Doudoroff  
688 glycolytic pathway. *The Plant Journal* **70**: 1004–1014.
- 689 **Friesen JA, Rodwell VW. 2004.** The 3-hydroxy-3-methylglutaryl coenzyme-A (HMG-CoA)  
690 reductases. *Genome biology* **5**: 248.
- 691 **Gallo C, Ippolito G, Nuzzo G, Sardo A, Fontana A. 2017.** Autoinhibitory sterol sulfates  
692 mediate programmed cell death in a bloom-forming marine diatom. *Nature Communications*  
693 **8**: 1–11.
- 694 **Garaiova M, Zambojova V, Simova Z, Griac P, Hapala I. 2014.** Squalene epoxidase as a  
695 target for manipulation of squalene levels in the yeast *Saccharomyces cerevisiae*. *FEMS yeast*  
696 *research* **14**: 310–323.
- 697 **George J, Kahlke T, Abbriano RM, Kuzhiumparambil U, Ralph PJ, Fabris M. 2020.**  
698 Metabolic engineering strategies in diatoms reveal unique phenotypes and genetic  
699 configurations with implications for algal genetics and synthetic biology. *Frontiers in*  
700 *Bioengineering and Biotechnology* **8**: 513.

- 701 **Gill S, Stevenson J, Kristiana I, Brown AJ. 2011.** Cholesterol-dependent degradation of  
702 squalene monooxygenase, a control point in cholesterol synthesis beyond HMG-CoA  
703 reductase. *Cell Metabolism* **13**: 260–273.
- 704 **Gohil N, Bhattacharjee G, Khambhati K, Braddick D. 2019.** Engineering strategies in  
705 microorganisms for the enhanced production of squalene: advances, challenges and  
706 opportunities. *Frontiers in Bioengineering and Biotechnology* **7**: 50.
- 707 **Gold DA, Caron A, Fournier GP, Summons RE. 2017.** Paleoproterozoic sterol  
708 biosynthesis and the rise of oxygen. *Nature* **543**: 420–423.
- 709 **Guillard RRL, Hargraves PE. 1993.** *Stichochrysis immobilis* is a diatom, not a  
710 chrysophyte. *Phycologia* **32**: 234–236.
- 711 **Harker M, Holmberg N, Clayton JC, Gibbard CL, Wallace AD, Rawlins S, Hellyer SA,  
712 Lanot A, Safford R. 2003.** Enhancement of seed phytosterol levels by expression of an N-  
713 terminal truncated *Hevea brasiliensis* (rubber tree) 3-hydroxy-3-methylglutaryl-CoA  
714 reductase. *Plant Biotechnology Journal* **1**: 113–121.
- 715 **Hildebrand M, Davis AK, Smith SR, Traller JC, Abbriano R. 2012.** The place of diatoms  
716 in the biofuels industry. *Biofuels* **3**: 221–240.
- 717 **Jaramillo-Madrid AC, Ashworth J, Fabris M, Ralph PJ. 2019.** Phytosterol biosynthesis  
718 and production by diatoms (Bacillariophyceae). *Phytochemistry* **163**: 46–57.
- 719 **Jaramillo-Madrid AC, Ashworth J, Fabris M, Ralph PJ. 2020a.** The unique sterol  
720 biosynthesis pathway of three model diatoms consists of a conserved core and diversified  
721 endpoints. *Algal Research* **48**: 101902.
- 722 **Jaramillo-Madrid AC, Ashworth J, Ralph PJ. 2020b.** Levels of Diatom Minor Sterols  
723 Respond to Changes in Temperature and Salinity. *Journal of Marine Science and  
724 Engineering* **8**: 85.
- 725 **Johnson LK, Alexander H, Brown CT. 2019.** Re-assembly, quality evaluation, and  
726 annotation of 678 microbial eukaryotic reference transcriptomes. *GigaScience* **8**: giy158.
- 727 **Jones P, Binns D, Chang H-Y, Fraser M, Li W, McAnulla C, McWilliam H, Maslen J,  
728 Mitchell A, Nuka G. 2014.** InterProScan 5: genome-scale protein function classification.  
729 *Bioinformatics* **30**: 1236–1240.
- 730 **Kajikawa M, Kinohira S, Ando A, Shimoyama M, Kato M, Fukuzawa H. 2015.**  
731 Accumulation of squalene in a microalga *Chlamydomonas reinhardtii* by genetic  
732 modification of squalene synthase and squalene epoxidase genes. *PLoS One* **10**: e0120446.
- 733 **Keeling PJ, Burki F, Wilcox HM, Allam B, Allen EE, Amaral-Zettler LA, Armbrust  
734 EV, Archibald JM, Bharti AK, Bell CJ. 2014.** The Marine Microbial Eukaryote  
735 Transcriptome Sequencing Project (MMETSP): illuminating the functional diversity of  
736 eukaryotic life in the oceans through transcriptome sequencing. *PLoS biology* **12**: e1001889.
- 737 **Kim Y, Lee OR, Oh JY, Jang M, Yang D. 2014.** Functional analysis of 3-Hydroxy-3-  
738 methylglutaryl Coenzyme A reductase encoding genes in triterpene saponin-producing  
739 Ginseng. *Plant physiology* **165**: 373–387.
- 740 **Krogh A, Larsson B, Von Heijne G, Sonnhammer EL. 2001.** Predicting transmembrane  
741 protein topology with a hidden Markov model: application to complete genomes. *Journal of  
742 molecular biology* **305**: 567–580.

- 743 **Kroth PG. 2002.** Protein transport into secondary plastids and the evolution of primary and  
744 secondary plastids. In: *International Review of Cytology*. Academic Press, 191–255.
- 745 **Kuwabara PE, Labouesse M. 2002.** The sterol-sensing domain: multiple families, a unique  
746 role? *TRENDS in Genetics* **18**: 193–201.
- 747 **Lange I, Poirier BC, Herron BK, Lange BM. 2015.** Comprehensive assessment of  
748 transcriptional regulation facilitates metabolic engineering of isoprenoid accumulation in  
749 *Arabidopsis*. *Plant Physiology* **169**: 1595–1606.
- 750 **Lange BM, Rujan T, Martin W, Croteau R. 2000.** Isoprenoid biosynthesis: the evolution  
751 of two ancient and distinct pathways across genomes. *Proceedings of the National Academy*  
752 *of Sciences* **97**: 13172–13177.
- 753 **Laranjeira S, Amorim-Silva V, Esteban A, Arró M, Ferrer A, Tavares RM, Botella MA,**  
754 **Rosado A, Azevedo H. 2015.** *Arabidopsis* Squalene Epoxidase 3 (SQE3) Complements  
755 SQE1 and Is Important for Embryo Development and Bulk Squalene Epoxidase Activity.  
756 *Molecular Plant* **8**: 1090–1102.
- 757 **Leber R, Landl K, Zinser E, Ahorn H, Spo A, Kohlwein SD, Turnowsky F. 1998.** Dual  
758 localization of squalene epoxidase , Erg1p , in yeast reflects a relationship between the  
759 endoplasmic reticulum and lipid particles. *Molecular Biology of the Cell* **9**: 375–386.
- 760 **Lee M, Jeong J, Seo J, Shin C, Kim Y, In J, Yang D, Yi J, Choi Y. 2004.** Enhanced  
761 triterpene and phytosterol biosynthesis in *Panax ginseng* overexpressing squalene synthase  
762 gene. *Plant Cell Physiology* **45**: 976–984.
- 763 **Lee A-R, Kwon M, Kang M-K, Kim J, Kim S-U, Ro D-K. 2019.** Increased sesqui- and  
764 triterpene production by co-expression of HMG-CoA reductase and biotin carboxyl carrier  
765 protein in tobacco (*Nicotiana benthamiana*). *Metabolic Engineering* **52**: 20–28.
- 766 **Leivar P, González VM, Castel S, Trelease RN, López-Iglesias C, Arró M, Boronat A,**  
767 **Campos N, Ferrer A, Fernández-Busquets X. 2005.** Subcellular localization of  
768 *Arabidopsis* 3-hydroxy-3-methylglutaryl-coenzyme A reductase. *Plant physiology* **137**: 57–  
769 69.
- 770 **Li W, Liu W, Wei H, He Q, Chen J, Zhang B, Zhu S. 2014.** Species-specific expansion  
771 and molecular evolution of the 3-hydroxy-3-methylglutaryl coenzyme A reductase (HMGR)  
772 gene family in plants. *PLoS One* **9**: e94127.
- 773 **Liu X, Hempel F, Stork S, Bolte K, Moog D, Heimerl T, Maier UG, Zauner S. 2016.**  
774 Addressing various compartments of the diatom model organism *Phaeodactylum tricorutum*  
775 via sub-cellular marker proteins. *Algal Research* **20**: 249–257.
- 776 **Lohr M, Schwender J, Polle JE. 2012.** Isoprenoid biosynthesis in eukaryotic phototrophs: a  
777 spotlight on algae. *Plant Science* **185**: 9–22.
- 778 **Massé G, Belt ST, Rowland SJ, Rohmer M. 2004.** Isoprenoid biosynthesis in the diatoms  
779 *Rhizosolenia setigera* (Brightwell) and *Haslea ostrearia* (Simonsen). *Proceedings of the*  
780 *National Academy of Sciences of the United States of America* **101**: 4413–4418.
- 781 **Nagai T, Ibata K, Park ES, Kubota M, Mikoshiba K, Miyawaki A. 2002a.** A variant of  
782 yellow fluorescent protein with fast and efficient maturation for cell-biological applications.  
783 *Nature Biotechnology* **20**: 87–90.
- 784 **Nagai M, Sakakibara J, Nakamura Y, Gejyo F, Ono T. 2002b.** SREBP-2 and NF-Y are  
785 involved in the transcriptional regulation of squalene epoxidase. *Biochemical and*



- 786 *Biophysical Research Communications* **295**: 74–80.
- 787 **Polakowski T, Stahl U, Lang C. 1998.** Overexpression of a cytosolic  
788 hydroxymethylglutaryl-CoA reductase leads to squalene accumulation in yeast. *Applied*  
789 *Microbiology and Biotechnology* **49**: 66–71.
- 790 **Pollak B, Cerda A, Delmans M, Álamos S, Moyano T, West A, Gutiérrez RA, Patron**  
791 **NJ, Federici F, Haseloff J. 2019.** Loop assembly: a simple and open system for recursive  
792 fabrication of DNA circuits. *New Phytologist* **222**: 628–640.
- 793 **Pollier J, Vancaester E, Kuzhiumparambil U, Vickers C, Vandepoele K, Goossens A,**  
794 **Fabris M. 2019.** A widespread alternative squalene epoxidase participates in eukaryote  
795 steroid biosynthesis. *Nature Microbiology* **4**: 226–233.
- 796 **Rampen SW, Abbas BA, Schouten S, Damste JSS. 2010.** A comprehensive study of sterols  
797 in marine diatoms (Bacillariophyta): Implications for their use as tracers for diatom  
798 productivity. *Limnology and Oceanography* **55**: 91–105.
- 799 **Ras RT, Geleijnse JM, Trautwein EA. 2014.** LDL-cholesterol-lowering effect of plant  
800 sterols and stanols across different dose ranges: a meta-analysis of randomised controlled  
801 studies. *British Journal of Nutrition* **112**: 214–219.
- 802 **Re EB, Jones D, Learned RM. 1995.** Co-expression of native and introduced genes reveals  
803 cryptic regulation of HMG CoA reductase expression in Arabidopsis. *The Plant Journal* **7**:  
804 771–784.
- 805 **Sasso S, Pohnert G, Lohr M, Mittag M, Hertweck C. 2012.** Microalgae in the postgenomic  
806 era: a blooming reservoir for new natural products. *FEMS Microbiology Reviews* **36**: 761–  
807 785.
- 808 **Schaller H, Grausem B, Benveniste P, Chye ML, Tan CT, Song YH, Chua NH. 1995.**  
809 Expression of the *Hevea brasiliensis* (H.B.K.) Müll. Arg. 3-hydroxy-3-methylglutaryl-  
810 coenzyme a reductase 1 in tobacco results in sterol overproduction. *Plant Physiology* **109**:  
811 761–770.
- 812 **Schreiber U. 2004.** Pulse-amplitude-modulation (PAM) fluorometry and saturation pulse  
813 method: an overview. In: Chlorophyll a fluorescence. Springer, 279–319.
- 814 **Sheppard V, Poulsen N, Kröger N. 2010.** Characterization of an endoplasmic reticulum-  
815 associated silaffin kinase from the diatom *Thalassiosira pseudonana*. *Journal of Biological*  
816 *Chemistry* **285**: 1166–1176.
- 817 **Strand TA, Lale R, Degnes KF, Lando M, Valla S. 2014.** A new and improved host-  
818 independent plasmid system for RK2-based conjugal transfer. *PLoS One* **9**: 1–6.
- 819 **Theesfeld CL, Pourmand D, Davis T, Garza RM, Hampton RY. 2011.** The sterol-sensing  
820 domain (SSD) directly mediates signal-regulated endoplasmic reticulum-associated  
821 degradation (ERAD) of 3-hydroxy-3-methylglutaryl (HMG)-CoA reductase isozyme Hmg2.  
822 *The Journal of biological chemistry* **286**: 26298–26307.
- 823 **Valitova JN, Sulkarnayeva AG, Minibayeva F V. 2016.** Plant sterols: Diversity,  
824 biosynthesis, and physiological functions. *Biochemistry* **81**: 819–834.
- 825 **Vavitsas K, Fabris M, Vickers CE. 2018.** Terpenoid Metabolic Engineering in  
826 Photosynthetic Microorganisms. *Genes* **9**: 2520.
- 827 **Vranova E, Coman D, Gruissem W. 2013.** Network Analysis of the MVA and MEP

- 828 Pathways for Isoprenoid Synthesis. *Annual review of plant biology* **64**: 665–700.
- 829 **Wang J, Huang M, Yang J, Ma X, Zheng S, Deng S, Huang Y, Yang X. 2017.** Anti-  
830 diabetic activity of stigmasterol from soybean oil by targeting the GLUT4 glucose  
831 transporter. *Food & Nutrition Research* **61**: 1364117.
- 832 **Zhang D-H, Jiang L-X, Li N, Yu X, Zhao P, Li T, Xu J-W. 2017.** Overexpression of the  
833 squalene epoxidase gene alone and in combination with the 3-Hydroxy-3-methylglutaryl  
834 Coenzyme A gene increases ganoderic acid production in *Ganoderma lingzhi*. *Journal of*  
835 *Agricultural and Food Chemistry* **65**: 4683–4690.
- 836
- 837
- 838
- 839
- 840
- 841

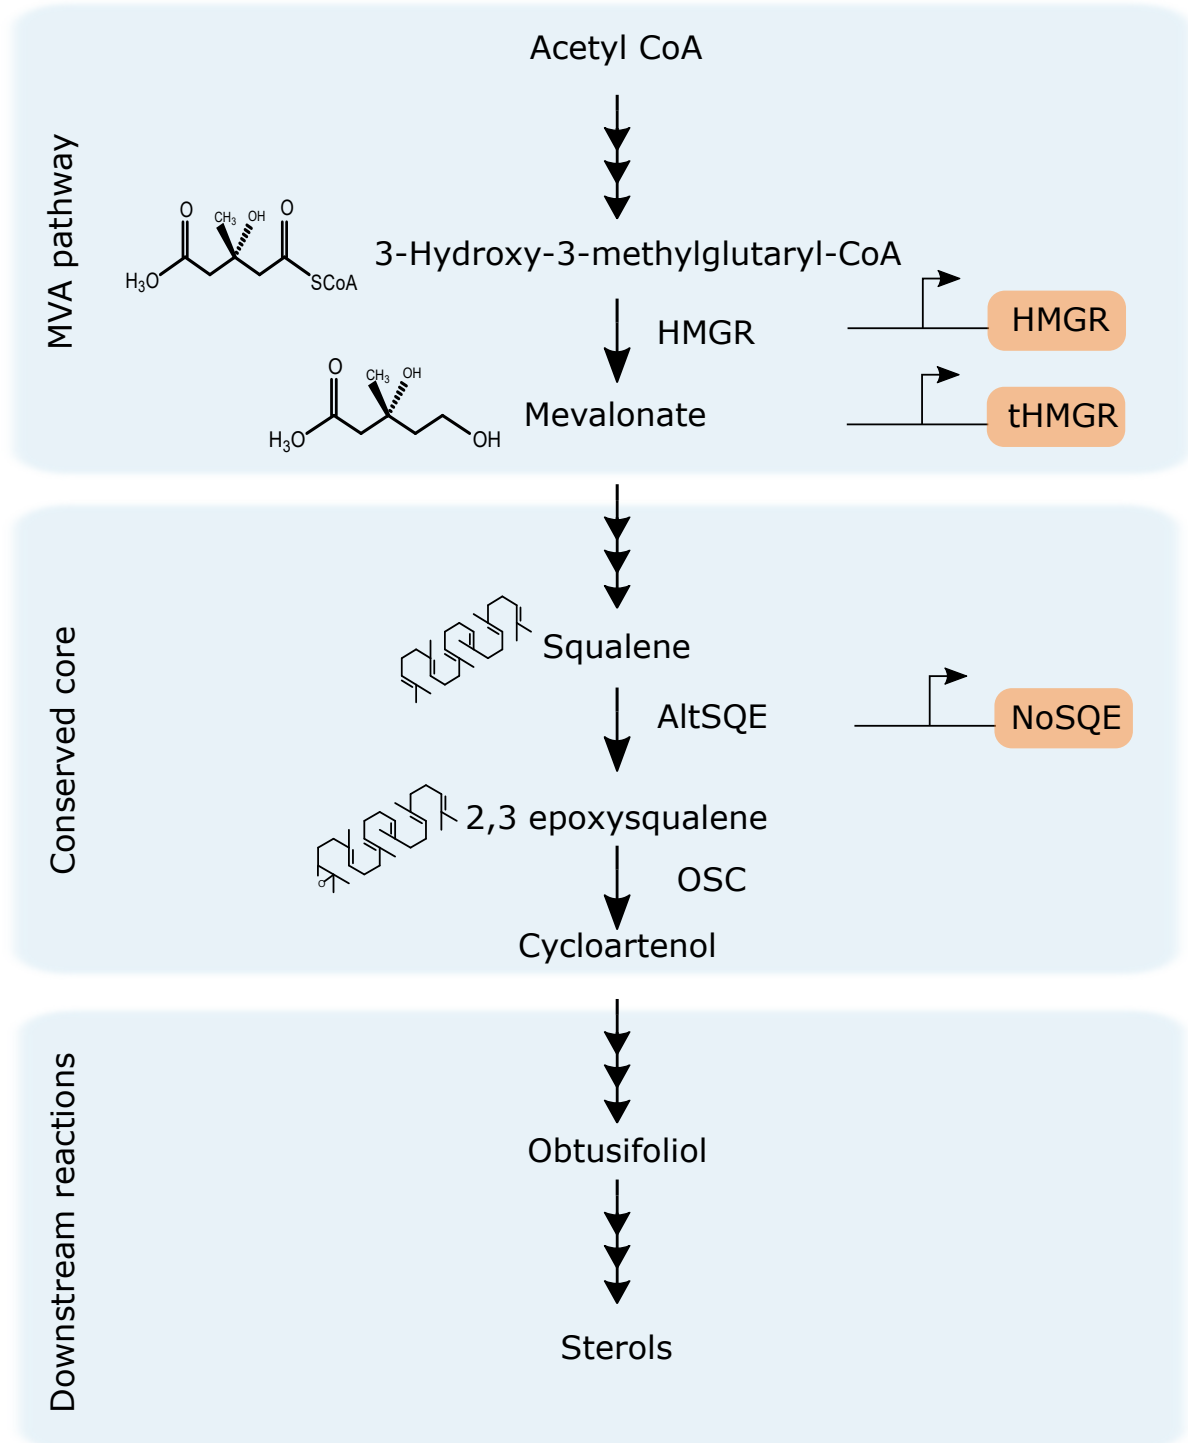

Figure 1: Upstream reactions and conserved core of sterol biosynthesis pathway in diatoms and genetic targets overexpressed in this study, highlighted in orange. Mevalonate pathway, MVA; 3-hydroxy-3-methylglutaryl-coenzyme A reductase, HMGR, truncated HMGR, tHMGR, alternative squalene epoxidase, AltSQE, squalene epoxidase from *N. oceanica*, NoSQE, oxidosqualene cyclase, OSC.

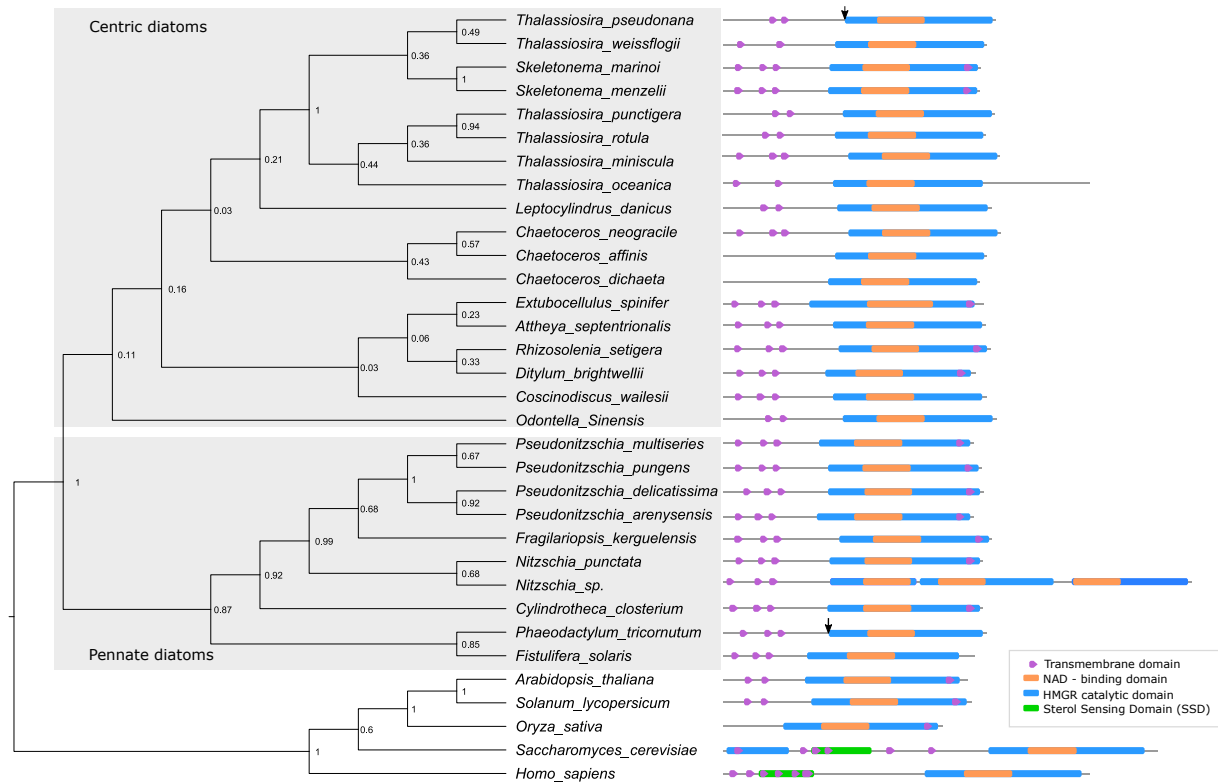

Figure 2: Maximum likelihood phylogenetic tree of diatom HMGR proteins and its domains. Numbers at the nodes represent bootstrap support (1000 replicates). HMGR from yeast, mammals and plants were used as outgroups. Arrow represent start of N-terminal truncated version for *P. tricornutum* and *T. pseudonana* used in this study.

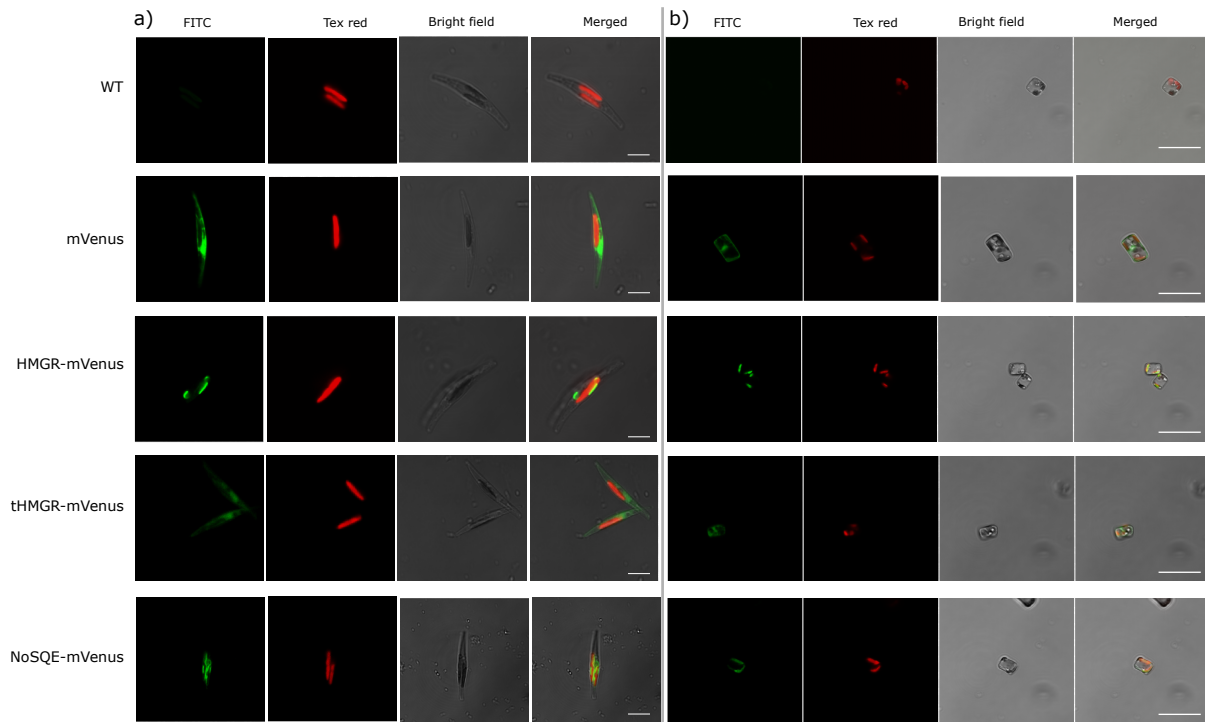

Figure 3: Confocal microscopy images showing subcellular localization of the mVenus fusion with target proteins in representative transgenic a) *P. tricornutum* cells, scale bars correspond to 5  $\mu\text{m}$  and b) *T. pseudonana* cells, scale bars correspond to 10  $\mu\text{m}$ . Wild type (WT) as negative control and control cell lines that only expressed mVenus. 3-hydroxy-3-methylglutaryl-coenzyme A reductase, HMGR-mVenus, truncated HMGR, tHMGR-mVenus, squalene epoxidase from *N. oceanica*, NoSQE-mVenus. Scale bars correspond to 10  $\mu\text{m}$ .

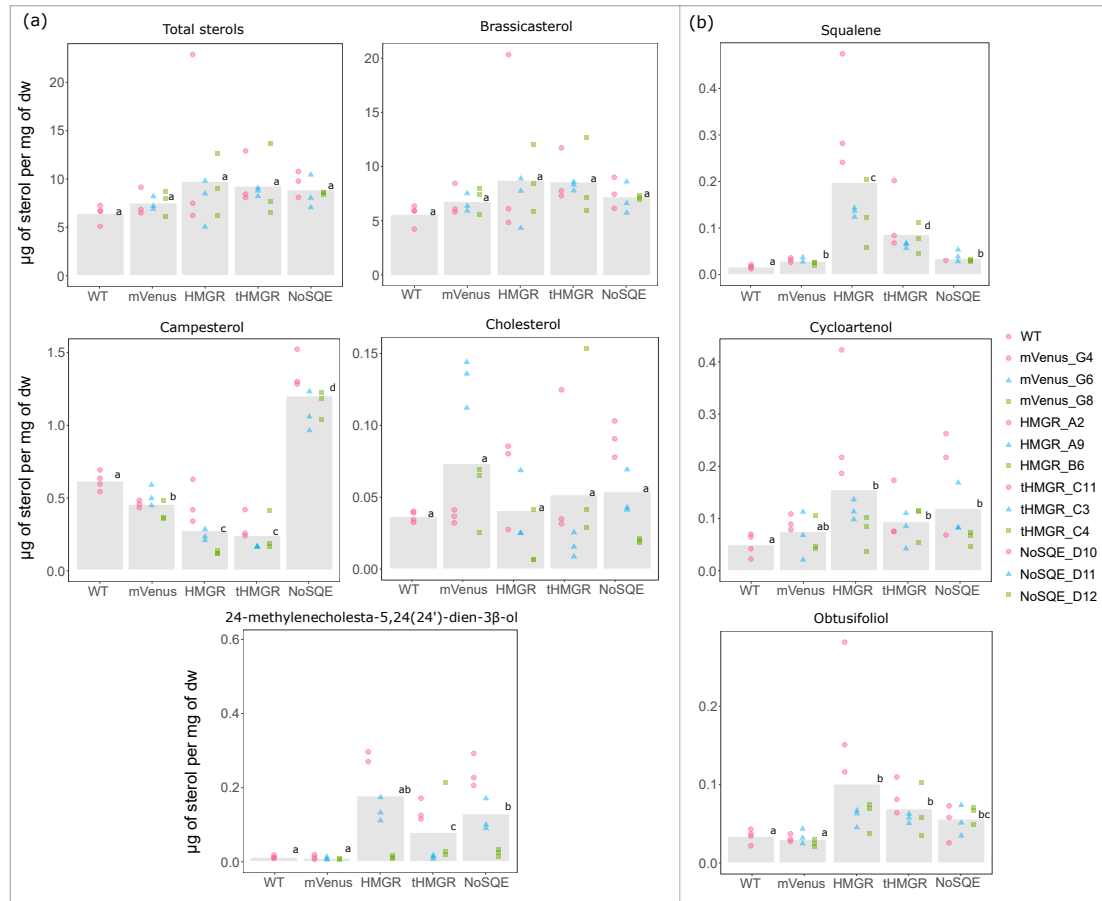

Figure 4: Sterol levels in *P. tricornutum* transformants. (a) End-point sterol (b) intermediates accumulation. Identical letters denote no statistically significant differences among groups using the Pairwise Wilcoxon Rank Sum tests ( $p < 0.05$ ,  $n = 9$ ).
